# Supplementary material for: Efficacy of the Toxicity Control during the Degradation of TBBPA by Ozonation
Source: MDPI journal article supplement (doi:10.3390/w14162543), 2022-08-18
Supplement: s1 [file s1]

Archive with 1 entries (1 files):
- water-1801806-supplementary.pdf
