# Supplementary material for: Efficacy of the Toxicity Control during the Degradation of TBBPA by Ozonation
Source: MDPI journal article supplement (doi:10.3390/w14162543), 2022-08-18
Supplement: s1 [file s1 › water-1801806-supplementary.pdf]

# Efficacy of the Toxicity Control during the Degradation of TBBPA by Ozonation

Qi Han <sup>1,2</sup>, Wenyi Dong <sup>2</sup>, Hongjie Wang <sup>2</sup>, Boping Yu <sup>1</sup>, Peng Liu <sup>3,\*</sup>, Linshen Xie <sup>1</sup> and Zhiguang Dai <sup>1</sup>

<sup>1</sup> Shenzhen Research Academy of Environmental Sciences, Shenzhen 518001, China

<sup>2</sup> School of Civil and Environmental Engineering, Harbin Institute of Technology (Shenzhen), Shenzhen 518055, China

<sup>3</sup> School of Environmental and Civil Engineering, Dongguan University of Technology, Dongguan 523808, China

\* Correspondence: liupeng2@dgut.edu.cn

## Text S. Toxicity testing methods

### (1) Acute toxicity

The acute toxicities of water samples were detected with a DeltaTox II luminometer (SDIX, USA), a commercial bioassay according to the ISO standard based on the inhibition of bioluminescence emitted by the luminescent bacteria *V. fischeri*. The specific steps were as follows: Firstly, 310 µL of Micro Tox dilution was added to the luminescent bacteria freeze-dried test tube, which was evenly distributed into 3 test tubes after being cultured for 15 min at room temperature and the initial luminosity ( $E_0$ ) was recorded using the physiological fluid as a blank control. Then, 100 µL of Micro Tox osmotic adjustment solution (OAS) was taken into a 1000 µL water sample to be tested and shaken until uniform to adjust the salinity of the water sample to 3%. Finally, 900 µL of the above water sample was added into the corresponding sequence of luminescent bacteria tubes. The luminosity ( $E$ ) of the water sample was recorded after 5 min of exposure. The pH of the water sample was adjusted to neutral before the test and the test temperature was controlled at  $20 \pm 5$  °C. The 15 min EC50 of the quality control reference poison  $\text{HgCl}_2$  to the luminescent bacteria was 0.08–0.12 mg/L. The acute toxicity of the water sample was expressed by the relative luminosity inhibition rate ( $T\%$ ). The calculation formula was as shown in the following formula:

$$T\% = \frac{E_0 - E}{E_0} \cdot 100\% \quad (1)$$

where  $E_0$  and  $E$  represent the normalized bioluminescence intensities of the control and the water sample. The greater the value of  $T\%$ , the higher the acute toxicity of the water sample. According to the  $T\%$ , the half effect concentration EC50 of the water sample to the luminescent bacteria could be obtained. Then, the acute toxicity equivalent value TU of the water sample could be calculated by the formula ( $TU = 100\% / EC50$ ). When the water sample was less toxic to the luminescent bacteria and could not produce the half effect, the value of TU could be calculated by 50%. For example, if the luminosity decay rate of the water sample for the luminescent bacteria was 20%, the toxic equivalent was  $20\% / 50\% = 0.4$  TU.

### (2) Chronic toxicity

The chronic toxicities of samples were detected by the standard method of the *D. magna* 21 d chronic toxicity test following OECD guidelines. The maximum non-observed effect concentration (NOEC) was obtained to express the chronic toxicity effect. The specific steps were as follows. Firstly, the pre-test was carried out, through which the water sample was diluted to different concentration gradients and 2–3 parallels were set for each concentration. The 400 mL crystallized dish was used, equipped with 250–300 mL test

solution and 10 *D. magna*. Each test liquid was set up with a blank control containing an equal volume of dilution water. The mortality of *D. magna* for each container was recorded after 24 hours of the test, taking the heartbeat stop of *D. magna* as the end point of the test. According to the result of the pre-test, the 24 h half lethal concentration LC50 of water sample to *D. magna* was obtained. Then, 4~5 concentration gradients were set in the range of 0.01~0.5 times LC50 water sample concentration, and 10 parallels were set for each concentration. The aerated de-chlorination tap water was used as the blank control. Then, 1 *D. magna* was put in the 25 mL water sample or tap water, and was cultured for 21 days in an incubator with a light to dark ratio of 16:8 and 25 °C. It was fed water every two days and the survival of the *D. magna* was recorded every day. At the end of the trial, the mortality of *D. magna* in the blank control was not more than 10% effective. In the 21 d culture process, the maximum non-effect concentration NOEC of the water sample in the test group for *D. magna* was obtained as compared with the control group. The chronic toxicity equivalent of the water sample to *D. magna* was obtained according to the calculation formula  $TU=100\%/NOEC$ .

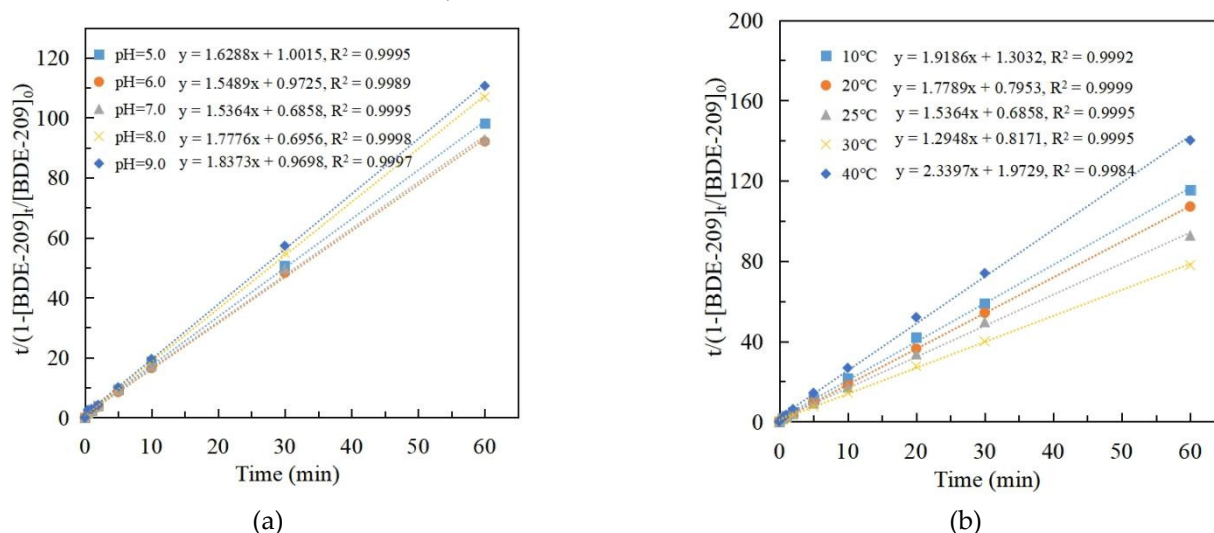

**Figure S1.** Reaction kinetics under different initial solution pH (5.0–9.0) (a) and temperatures (10–40 °C) (b). Experimental conditions: TBBPA concentration 0.28  $\mu\text{mol/L}$ ;  $[\text{O}_3]/[\text{TBBPA}] = 5:1$ ; initial solution pH=5.0, 6.0, 7.0, 8.0, 9.0 for (a), 7.0 for (b); temperature = 10, 20, 25, 30, 40 °C for (b), 25 °C for (a).
